# Supplementary material for: Cannabinoid receptor CB1 regulates STAT3 activity and its expression dictates the responsiveness to SR141716 treatment in human glioma patients' cells
Source: PubMed Central journal article supplement (PMC4558164; doi:10.18632/oncotarget.3895), 2015-05-11
Supplement: oncotarget-06-15464-s001.pdf [file oncotarget-06-15464-s001.pdf]

## SUPPLEMENTARY FIGURES AND TABLE

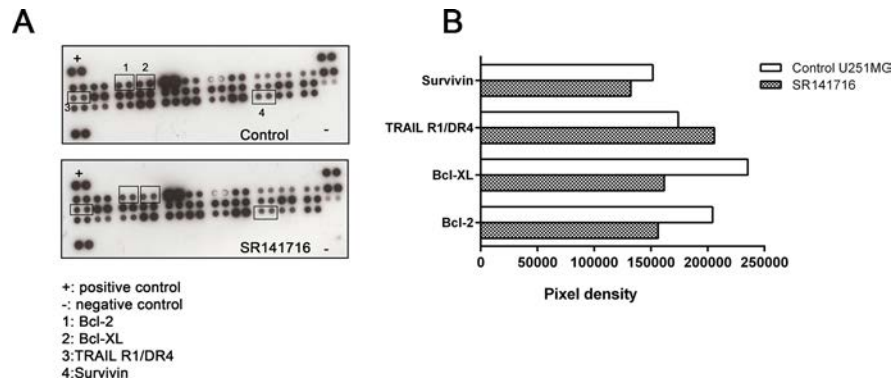

**Supplementary Figure S1: Effect of SR141716 treatment on the apoptotic protein expression profiles of U251 glioma cell line.** U251 cells were treated with SR141716 20  $\mu$ M for 24 h and cell lysates were used to determine different protein levels through a human array kit/proteome profiler. **A.** Panel shows a representative proteomic membrane analysis with indication of the modified proteins. **B.** Densitometric analysis of the membrane spots reported as pixel densities.

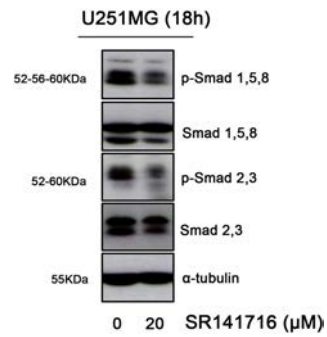

**Supplementary Figure S2: Effect of SR141716 treatment on Smad-dependent TGF- $\beta$  signaling pathway in U251 glioma cell line.** U251 cells were treated with SR141716 20  $\mu$ M for 18 h and cell lysates were subjected to western blot with anti-phospho-SMAD2/3, anti-phospho-SMAD1/5/8 and the corresponding anti-total-SMAD2/3 and anti-total-SMAD1/5/8 antibodies.  $\alpha$ -tubulin monoclonal antibody was used as an internal loading control.

**Supplementary Table S1.** Clinical characteristics of the patients' cohort

| Patient | Survival (months) | Recurrence (months) | Clinical Stage | Age | Gender | Treatment post-lesion     |
|---------|-------------------|---------------------|----------------|-----|--------|---------------------------|
| GBM2    | 15                | 9                   | Astro III      | 44  | M      | Chemotherapy-Radiotherapy |
| GBM5    | 17                | 38                  | Glioma II      | 69  | F      | Chemotherapy              |
| GBM7    | 16                | free                | IV             | 49  | M      | Chemotherapy-Radiotherapy |
| GBM15   | 9                 | 9                   | IV             | 73  | M      | STUPP Protocol            |
| GBM16   | 9                 | free                | Astro II       | 31  | M      | Wait and See              |
| GBM17   | 8                 | 9                   | IV             | 48  | F      | Chemotherapy              |
| GBM18   | 7                 | 4                   | IV             | 74  | M      | Chemotherapy              |
| GBM20   | 6                 | free                | IV             | 64  | M      | STUPP Protocol            |
| GBM21   | 10                | 4                   | IV             | 57  | M      | STUPP Protocol            |
| GBM22   | 8                 | free                | IV             | 72  | F      | STUPP Protocol            |
| GBM23   | 6                 | free                | Astroblastoma  | 27  | M      | STUPP Protocol            |
| GBM24   | 5                 | residual            | IV             | 65  | F      | STUPP Protocol            |
| GBM25   | 5                 | 3                   | IV             | 77  | F      | STUPP Protocol            |
| GBM26   | 2                 | residual            | IV             | 66  | M      | STUPP Protocol            |
| GBM27   | 2                 | residual            | IV             | 64  | F      | STUPP Protocol            |
| GBM28   | 8                 | 9                   | III            | 52  | M      | STUPP Protocol            |
| GBM29   | 8                 | 5                   | IV             | 43  | M      | Fotemustine               |
| GBM30   | 4                 | 1                   | IV             | 58  | F      | STUPP Protocol            |
| GBM31   | 5                 | residual            | Gliosarcoma    | 66  | M      | STUPP Protocol            |
| GBM32   | 7                 | 7                   | IV             | 48  | M      | Fotemustine               |
| GBM33   | 5                 | free                | IV             | 48  | F      | STUPP Protocol            |
| GBM34   | 6                 | 1                   | IV             | 54  | M      | STUPP Protocol            |
| GBM35   | 10                | free                | IV             | 41  | M      | STUPP Protocol            |
